# Supplementary material
Source: HighWire-hosted journal article supplement (https://jitc.bmj.com/content/10/12/e005660)

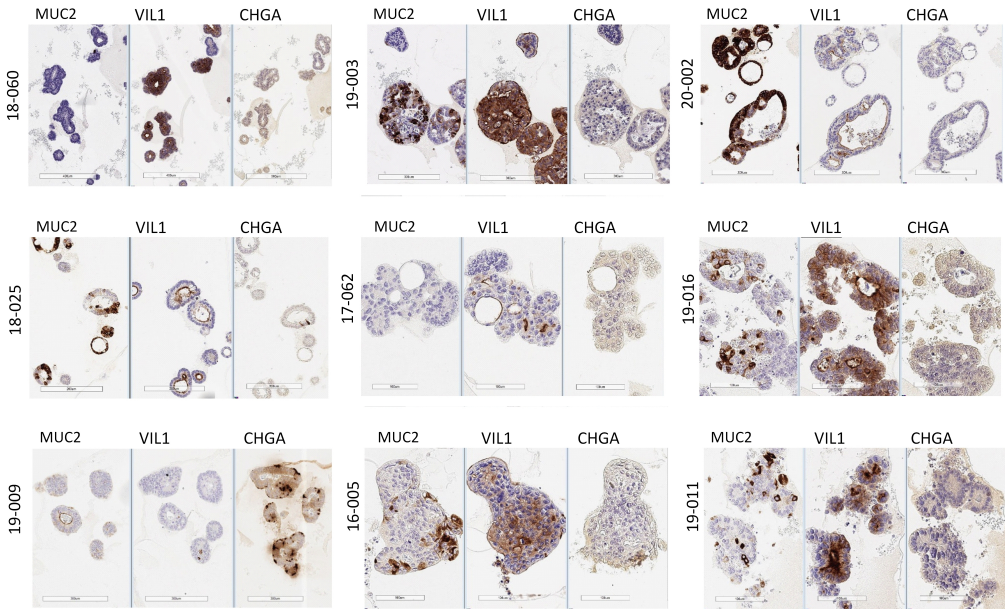

Suppl. Fig.3

Supplement: inline-supplementary-material-5 [file inline-supplementary-material-5.pdf]

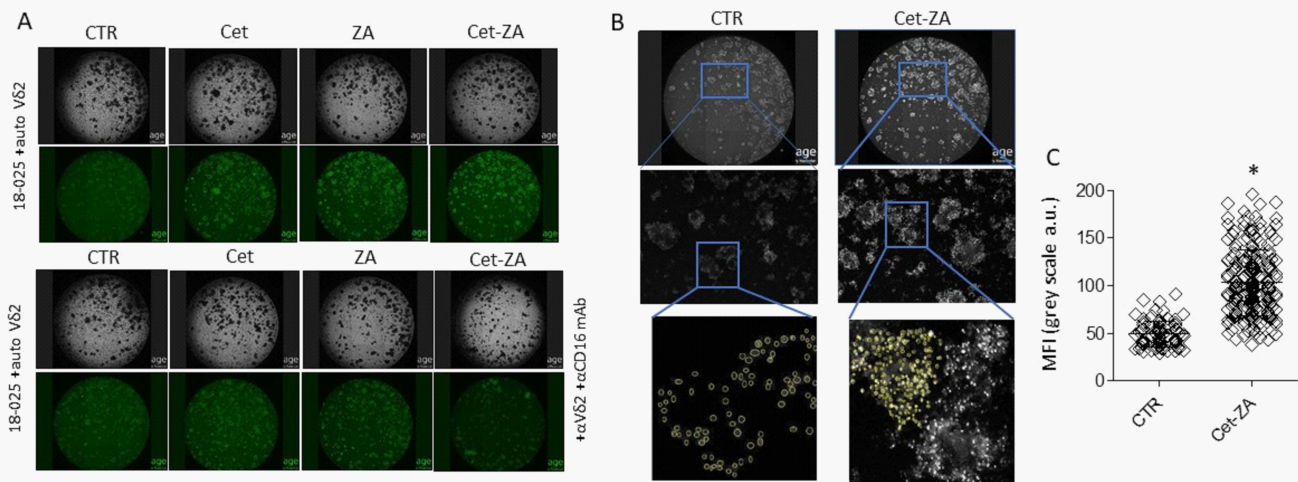

Suppl.Fig.5

Supplement: inline-supplementary-material-8 [file inline-supplementary-material-8.pdf]

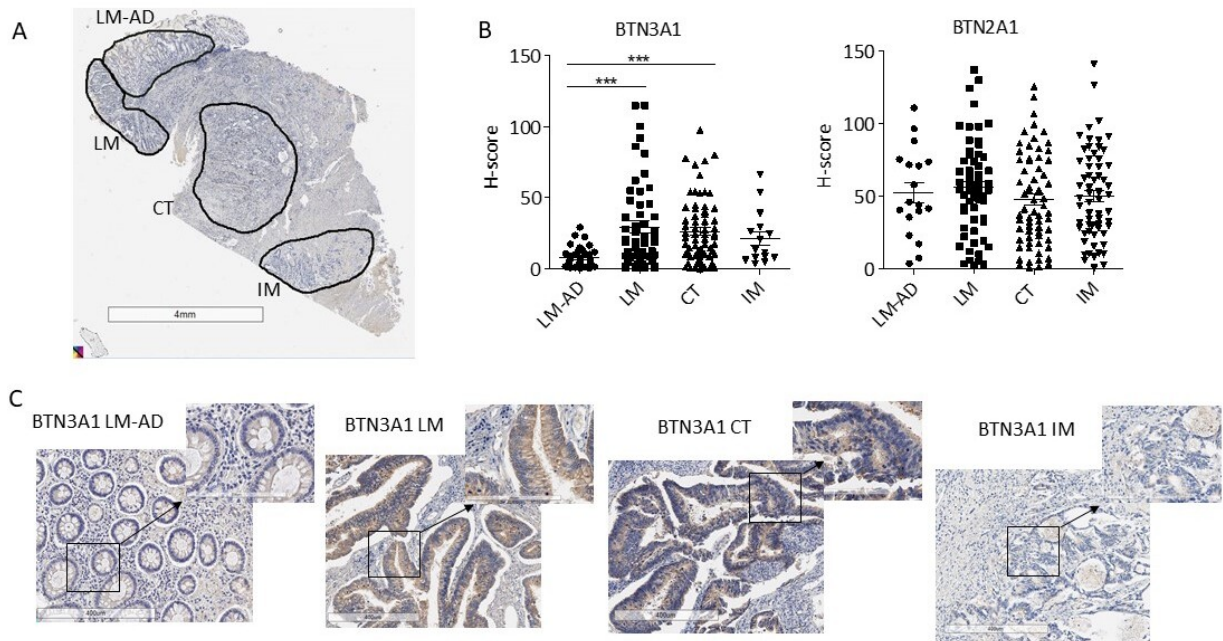

Suppl. Fig.6

Supplement: inline-supplementary-material-9 [file inline-supplementary-material-9.pdf]
